# Supplementary material for: Efficient visible light photocatalytic activity of CdS on (001) facets exposed to BiOCl
Source: Royal Society of Chemistry journal article supplement (doi:10.1039/c4nj00257a), 2014-01-01
Supplement: c4nj00257a1.pdf [file c4nj00257a1.pdf]

## Efficient visible light photocatalytic activity of CdS on (001) facets exposed to BiOCl

Bitao.Liu,\* Wenjing Xu, Ting Sun, Ming Chen, Liangliang Tian,\* Jinbiao Wang,

### Electronic Supplementary Information

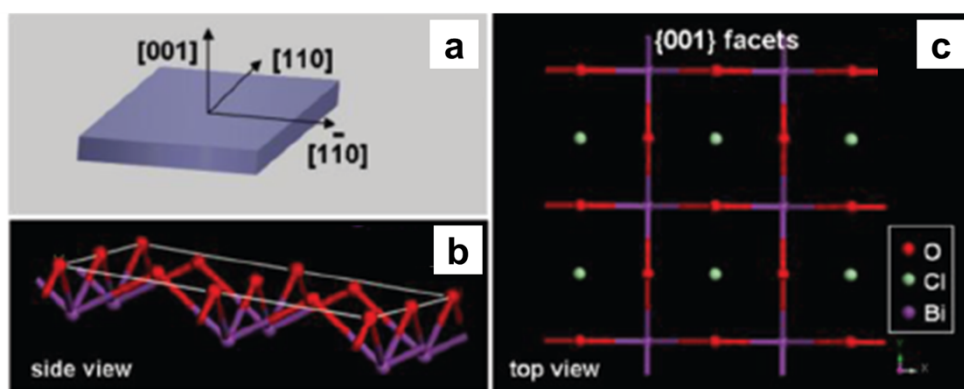

Fig. S1 Schematic illustration of the crystal orientation of the nanosheet (a), side (b) and top view (c) of atomic structure of the {001} facets.<sup>[1]</sup>

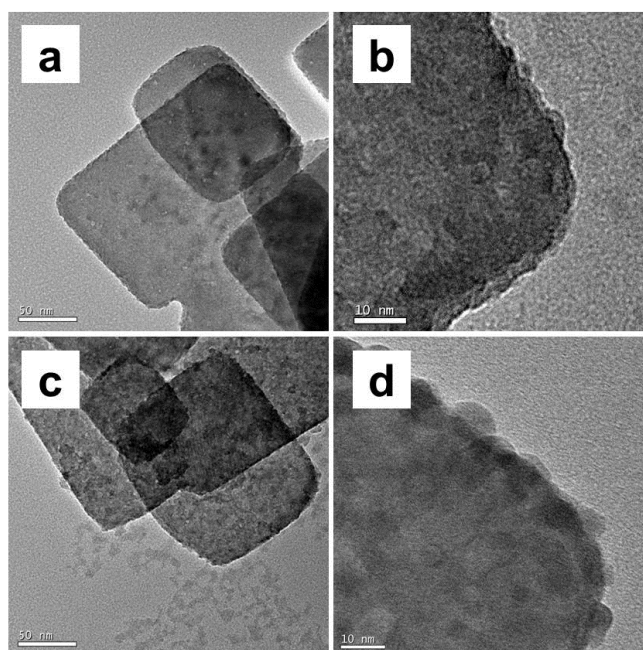

Fig. S2 TEM and HRTEM images of pure 1wt% CdS/BiOCl (a, b), 10wt% CdS/BiOCl (c, d).

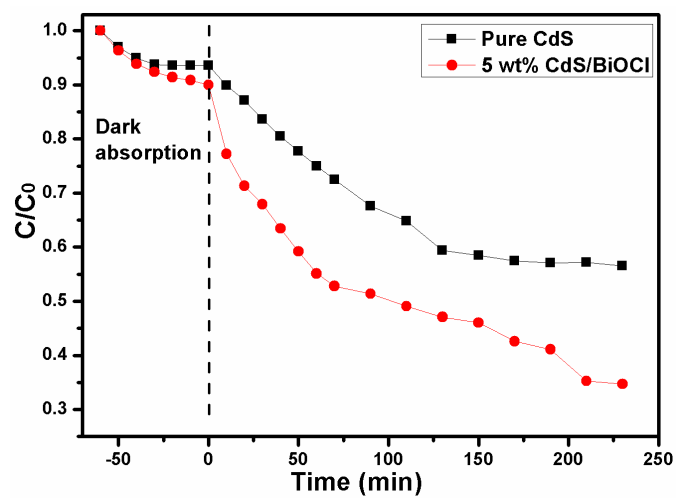

Fig. S3 Photocatalytic degradation of MO under the irradiation of visible light.
